# Supplementary material for: A journey through chaos and calmness: experiences of mindfulness training in patients with depressive symptoms after a recent coronary event - a qualitative diary content analysis
Source: BMC Psychol. 2018 Sep 13;6:46. doi: 10.1186/s40359-018-0252-1 (PMC6136221; doi:10.1186/s40359-018-0252-1)
Supplement: Supplementary file 1 — Codes derived from meaning units in raw data. Contains codes (short sentences) derived and condensed from the original raw data of participant’s diary entries. (PDF 44 kb) [file 40359_2018_252_MOESM1_ESM.pdf]

## Supplemental Table: Codes derived from meaning units in raw data

|                                                                     |                                                                             |
|---------------------------------------------------------------------|-----------------------------------------------------------------------------|
| Difficulties getting the point of practice                          | Reframing unpleasant sensations and difficulties as a positive experience   |
| Realizing it is hard change behaviours                              | Experiencing the lying down as pleasant                                     |
| Reflecting over expectations                                        | Feeling calmness, lightness and relaxation during practice                  |
| Reflections about how hard it is to prioritize oneself              | Experiencing less unpleasant sensations during practice                     |
| Having doubts about suitability for mindfulness                     | Feeling calmer after practice                                               |
| Reflecting thoughts about the instructions                          | Feeling more relaxed after practice                                         |
| Difficulties understanding the practices                            | Feeling energized after practice                                            |
| Having doubts about the right level of effort                       | Experiencing longing for the next practice session                          |
| Reflections over how to get the technique right                     | Feeling relaxed after the Silent day                                        |
| Reflecting over practicing in different places and times            | Experiencing elation and energy and an subsequent emotional dip             |
| Feeling stressed about finding the time to practice                 | Experiencing the Silent day as pleasant and rewarding                       |
| Finding it hard to write in the journal                             | Finding it easier to be present and find a calmness during the Silent day   |
| A sense of starting from the beginning all over again               | Having patience with the whole process                                      |
| Doubts about capacity to deal with Silent day                       | Observing a stream of different sensations during practice                  |
| Realizing unwholesome ways to cope with negative experiences        | Observing the breathing during practice                                     |
| Struggling with disturbances from the surrounding environment       | Observing neutral physical sensations during practice                       |
| Struggling with unpleasant and distracting thoughts during practice | Noticing bodily tensions from everyday experiences                          |
| Difficulties concentrating while practicing                         | Observing neutral experiences of sounds in the environment                  |
| Difficulties relaxing during practice                               | Observing the flow of thoughts during practice                              |
| Feeling stressed and worried during practice                        | Reflections over quietness                                                  |
| Feeling impatient during the practice                               | Experiencing not much at all during practice                                |
| Feeling a longing for signs of progress                             | Experiencing no special results from practicing                             |
| Experiencing a lack of healing closeness to nature                  | Experiencing surprising and unknown mental content                          |
| Judging the practice performance                                    | Experiencing an altered sense of time passing                               |
| Comparing different practices with each other                       | Experiencing a sense of heaviness during practice                           |
| Comparing experiences with earlier sessions                         | Experiencing surprising physical sensations during practice                 |
| Observing judging attitude and correcting ones attitude             | Experiencing various senses of emptiness during practice                    |
| Feeling depressed by slow walking                                   | Hard to focus but hopeful anyway                                            |
| Feeling depressed after the Silent day                              | Difficulties at start but an experience o flow after a while                |
| Feeling sadness during Silent day, and realizing a need for closure | Noticing simple yoga poses can be challenging                               |
| Experiencing a sense of sensory overload during walking             | Starting to realize what's the point of practicing                          |
| Feeling disappointment over the practice experience                 | Finding one dealing better with distractions during practice                |
| Realizing existing pain and aches has been there before             | Finding it easier to concentrate and experiencing a sense of progress       |
| Experiencing unpleasant sensations and physical symptoms            | Experiencing a sense of flow while practicing without guidance              |
| Feeling tired during practice                                       | Reframing unpleasant sensations and difficulties as a positive experience   |
| Falling asleep – or almost – during practice                        | Finding rewarding feelings when awareness returns to object of meditation   |
| Reflecting over strategies for dealing with drowsiness              | Experiencing mindful movement as rewarding                                  |
| Experiencing unpleasant sensations after the practice               | Experiencing the lying down as pleasant                                     |
| Feeling irritation after the practice                               | Feeling calmness, lightness and relaxation during practice                  |
| Experience of muscle soreness afterwards                            | Experiencing less unpleasant sensations during practice                     |
| Observing a stream of different sensations during practice          | Feeling calmer after practice                                               |
| Observing the breathing during practice                             | Feeling more relaxed after practice                                         |
| Observing neutral physical sensations during practice               | Feeling energized after practice                                            |
| Noticing bodily tensions from everyday experiences                  | Experiencing longing for the next practice session                          |
| Observing neutral experiences of sounds in the environment          | Feeling relaxed after the Silent day                                        |
| Observing the flow of thoughts during practice                      | Experiencing elation and energy and an subsequent emotional dip             |
| Reflections over quietness                                          | Experiencing the Silent day as pleasant and rewarding                       |
| Experiencing not much at all during practice                        | Finding it easier to be present and find a calmness during the Silent day   |
| Experiencing no special results from practicing                     | Having patience with the whole process                                      |
| Experiencing surprising and unknown mental content                  | Realizing that presence has a calming effect                                |
| Experiencing an altered sense of time passing                       | Experiencing more patience with life                                        |
| Experiencing a sense of heaviness during practice                   | Experiencing less resistance in everyday life                               |
| Experiencing surprising physical sensations during practice         | Experiencing less rumination in everyday life                               |
| Experiencing various senses of emptiness during practice            | Experiencing a heightened awareness of nature                               |
| Hard to focus but hopeful anyway                                    | Experiencing a heightened awareness of thoughts and reactions during stress |
| Difficulties at start but an experience o flow after a while        | Experiencing a sense of flexibility and control in life                     |
| Noticing simple yoga poses can be challenging                       | Finding it easier to deal with stress at work                               |
| Starting to realize what's the point of practicing                  | Finding the meditation useful in dealing with anxiety and tension           |
| Finding one dealing better with distractions during practice        | Finding it easier and rewarding to reach out to others                      |
| Finding it easier to concentrate and feeling a sense of progress    | Reflecting over mindfulness as an integrated habit in life                  |
| Experiencing a sense of flow while practicing without guidance      | Embracing difficult experiences as a kind of therapeutic process            |
|                                                                     | Mindfulness as part of a larger process of change                           |
